# Supplementary material
Source: publisher site journal article supplement (https://www.degruyter.com/publication/journal_key/PHON/downloadAsset/PHON_Call%20for%20an%20Editor.pdf)
Supplement: Supplementary file 1 [file PHON_Call%20for%20an%20Editor.pdf]

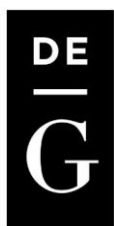

DE GRUYTER

**Call for an Editor**

**De Gruyter invites applications for the position of**

**Editor-in-Chief, *Phonetica***

We are looking for a new Editor-in-Chief of *Phonetica* to work with our existing team of expert Associate Editors and International Editorial Board. The new Editor will also have the opportunity to further shape the team.

*Phonetica* publishes contemporary interdisciplinary research on phonetics that employs a wide range of approaches, from instrumental measures to perceptual and neurocognitive procedures, to computational modelling, for investigating the properties and principles of phonetics in communicative settings across the world's languages. It also ranges across styles, types of language users, and communicative modalities (speech, sign, song).

*Phonetica* is an international forum for phonetic science that covers all aspects of the subject matter, from phonetic and phonological descriptions, to articulatory and signal analytic measures of production, to perception, acquisition, and phonetic variation and change.

*Phonetica* thus provides a platform for a comprehensive understanding of producer-perceiver interaction across languages and dialects, and of learning throughout the lifespan and across contexts. Papers published in this journal report expert original work that deals both with theoretical issues, new empirical data, and innovative methods and applications that help to advance the field.

*Phonetica* publishes six issues per year.

Applications should comprise a covering letter, a CV, and a 300-word summary about how your experience matches the aims and scope of *Phonetica*, and how you envisage the journal will develop under your leadership.

**The deadline for applications is 29 February 2024.**

Please contact Megan Gough (Journal Manager, *Phonetica*) at [megan.gough@degruyter.com](mailto:megan.gough@degruyter.com) with any informal queries.

Applications should be sent by email to the current Editor-in-Chief, Catherine Best ([C.Best@westernsydney.edu.au](mailto:C.Best@westernsydney.edu.au)), and the Journal Manager for *Phonetica*, Megan Gough ([megan.gough@degruyter.com](mailto:megan.gough@degruyter.com)).
